# Supplementary material for: 4-Phenylbutyric Acid (4-PBA) Derivatives Prevent SOD1 Amyloid Aggregation In Vitro with No Effect on Disease Progression in SOD1-ALS Mice
Source: MDPI journal article supplement (doi:10.3390/ijms23169403), 2022-08-20
Supplement: s1 [file s1]

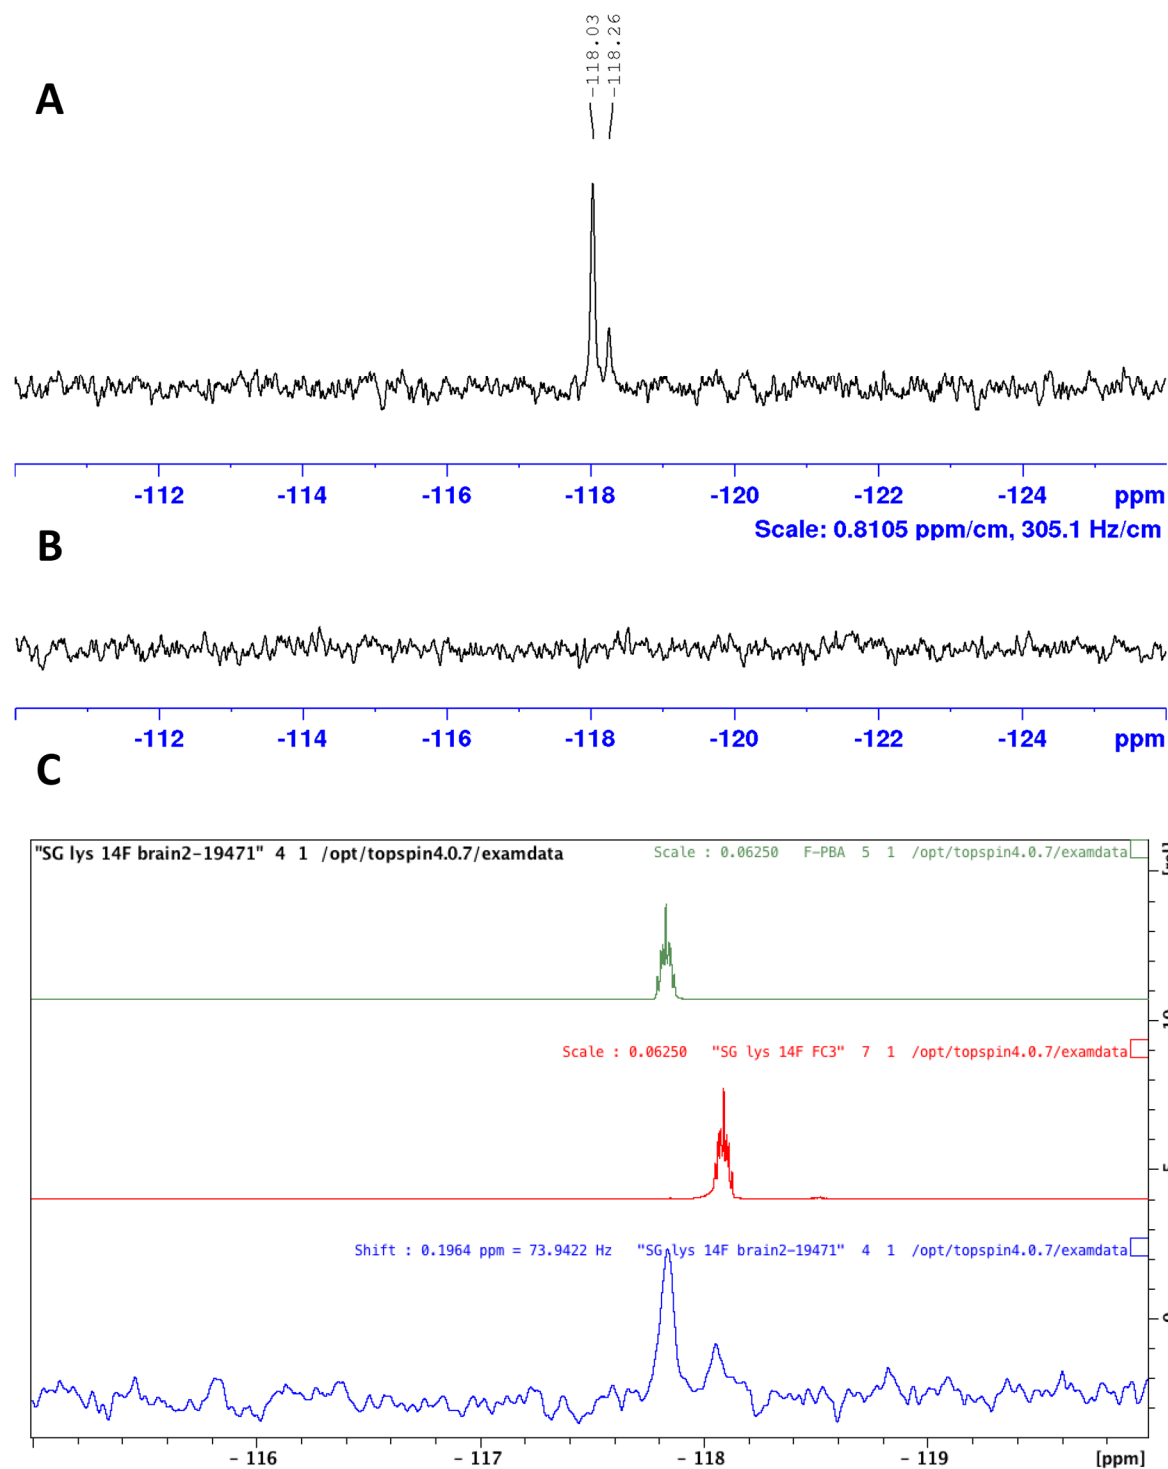

**Figure S1:** Detection of  $^{19}\text{F}$ -NMR in brain homogenates from mouse treated with  $^{19}\text{F}$ -C4 (A) or (B) treated with acetate buffer. (C) Comparison between  $^{19}\text{F}$ -NMR spectra of  $^{19}\text{F}$ 4-PBA (green line),  $^{19}\text{F}$ -C4 (red line) and the  $^{19}\text{F}$ -NMR spectra from brain homogenate of mouse treated  $^{19}\text{F}$ -C4 (blue line).

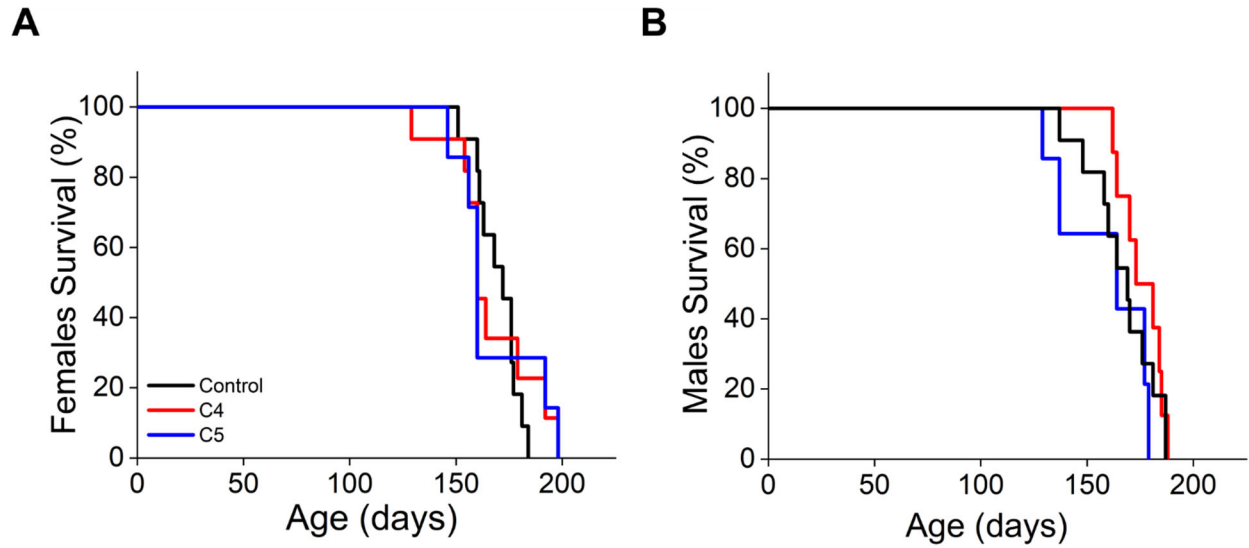

**Figure S2: C4 and C5 treatment did not significantly extend the survival of SOD1<sup>G93A</sup> mice.** Treated SOD1<sup>G93A</sup> mice received daily intraperitoneal injections of C4 (red, n=12) or C5 (blue, n=12), starting at p104. The control group includes non-injected and acetate buffer injected mice (black, n=24). **(A, B)** C4 and C5 treatment does not significantly extend the survival of females **(A)** and male **(B)** SOD1<sup>G93A</sup> mice.

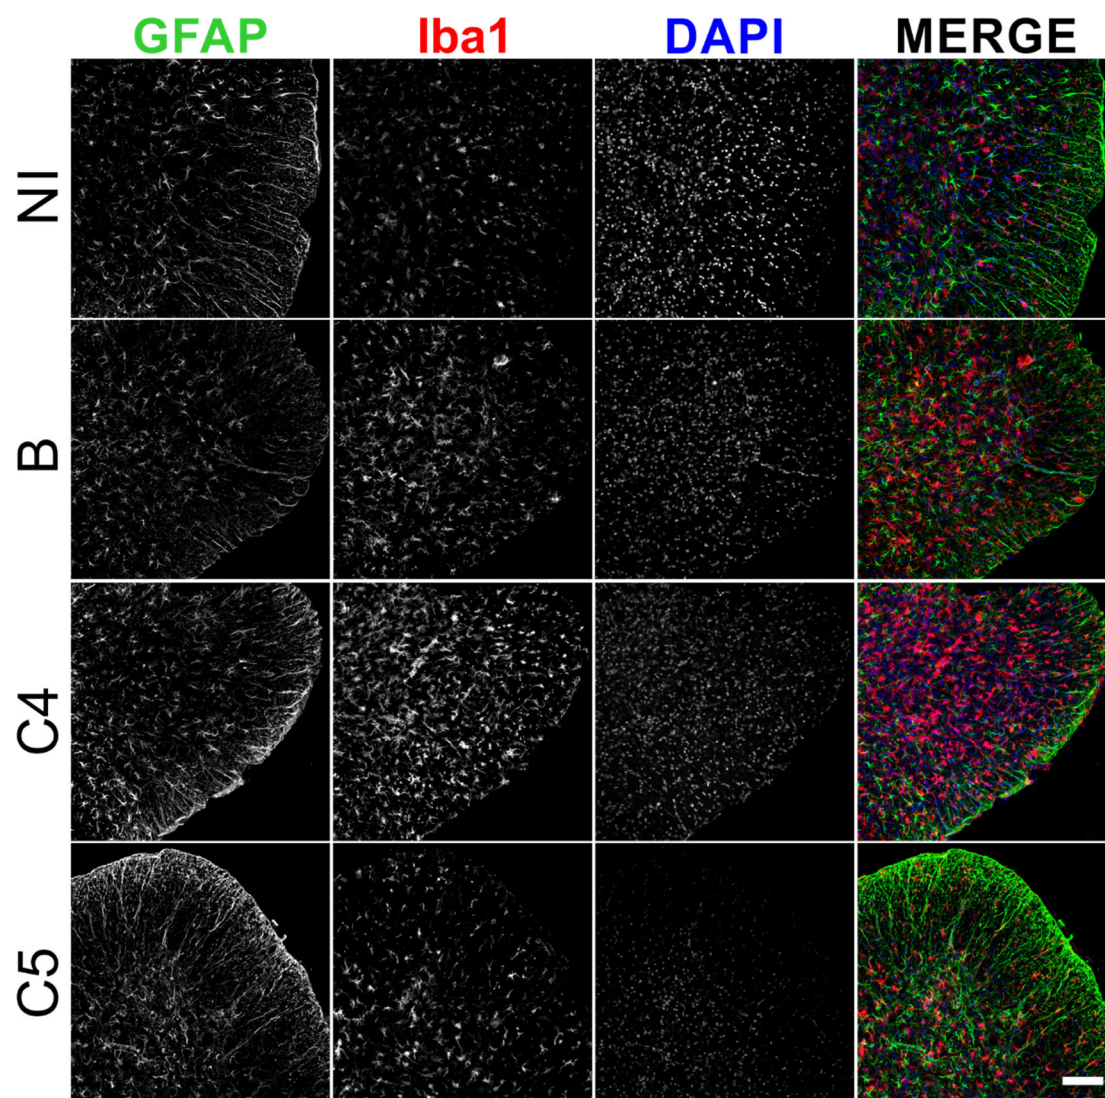

**Figure S3: C4 and C5 treatment had no effect on the neuroinflammatory response in SOD1<sup>G93A</sup> mice spinal cords.** Immunofluorescence staining of activated astrocytes (GFAP) and activated microglia (Iba1) in lumbar spinal cord sections of SOD1<sup>G93A</sup> mice. Scale bar= 100μm.

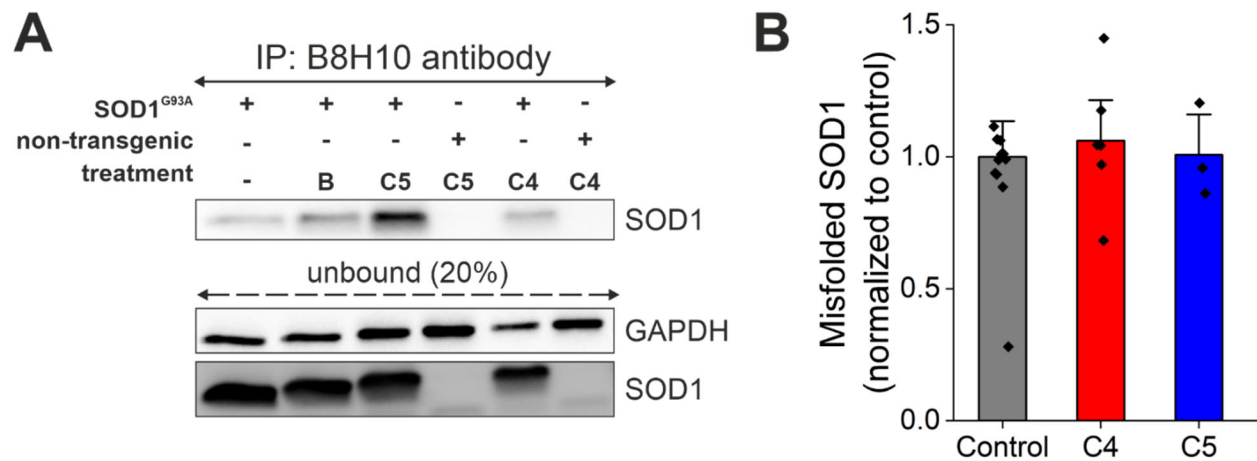

**Figure S4: C4 and C5 chemical chaperones did not reduce SOD1 misfolding *in vivo*.** (A) Misfolded-SOD1 levels were detected by immunoblotting of immunoprecipitates produced with B8H10 antibody, from SOD1<sup>G93A</sup> mice brains. IP- immunoprecipitation; B- acetate buffer. (B) Quantification of misfolded-SOD1 levels in untreated (grey) and C4 (red) and C5 (blue) treated SOD1<sup>G93A</sup> mice.

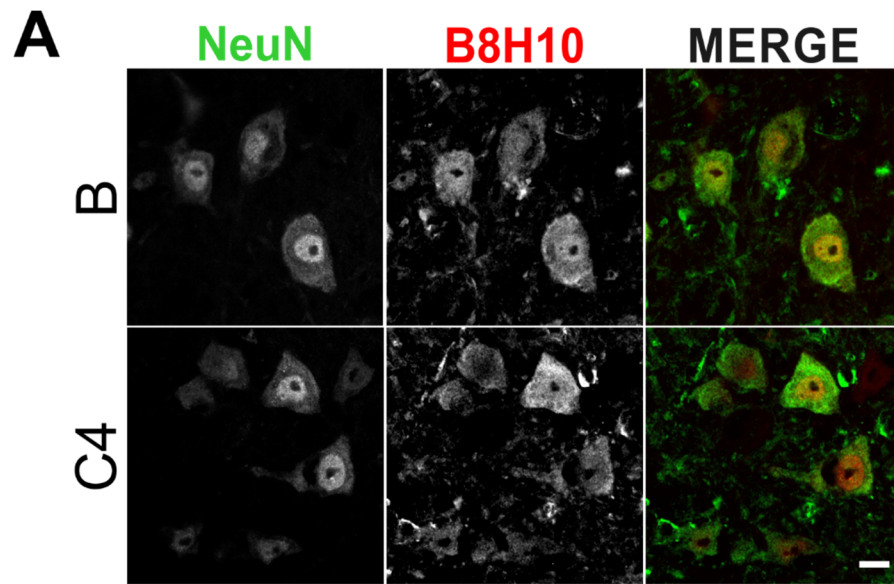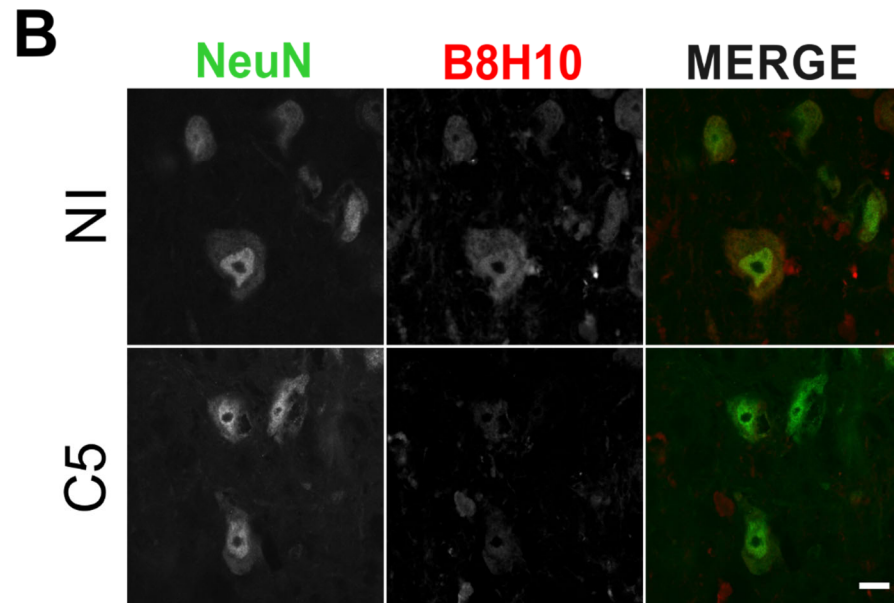

**Figure S5: C4 and C5 treatment had no effect on the accumulation of misfolded SOD1 in the spinal cord of mutant SOD1<sup>G93A</sup> mice. (A, B) Immunofluorescence staining of motor neurons (NeuN) and misfolded SOD1 (B8H10) in lumbar spinal sections of C4 (A) and C5-treated (B) mice and untreated SOD1<sup>G93A</sup> mice. Scale bar= 10μm.**

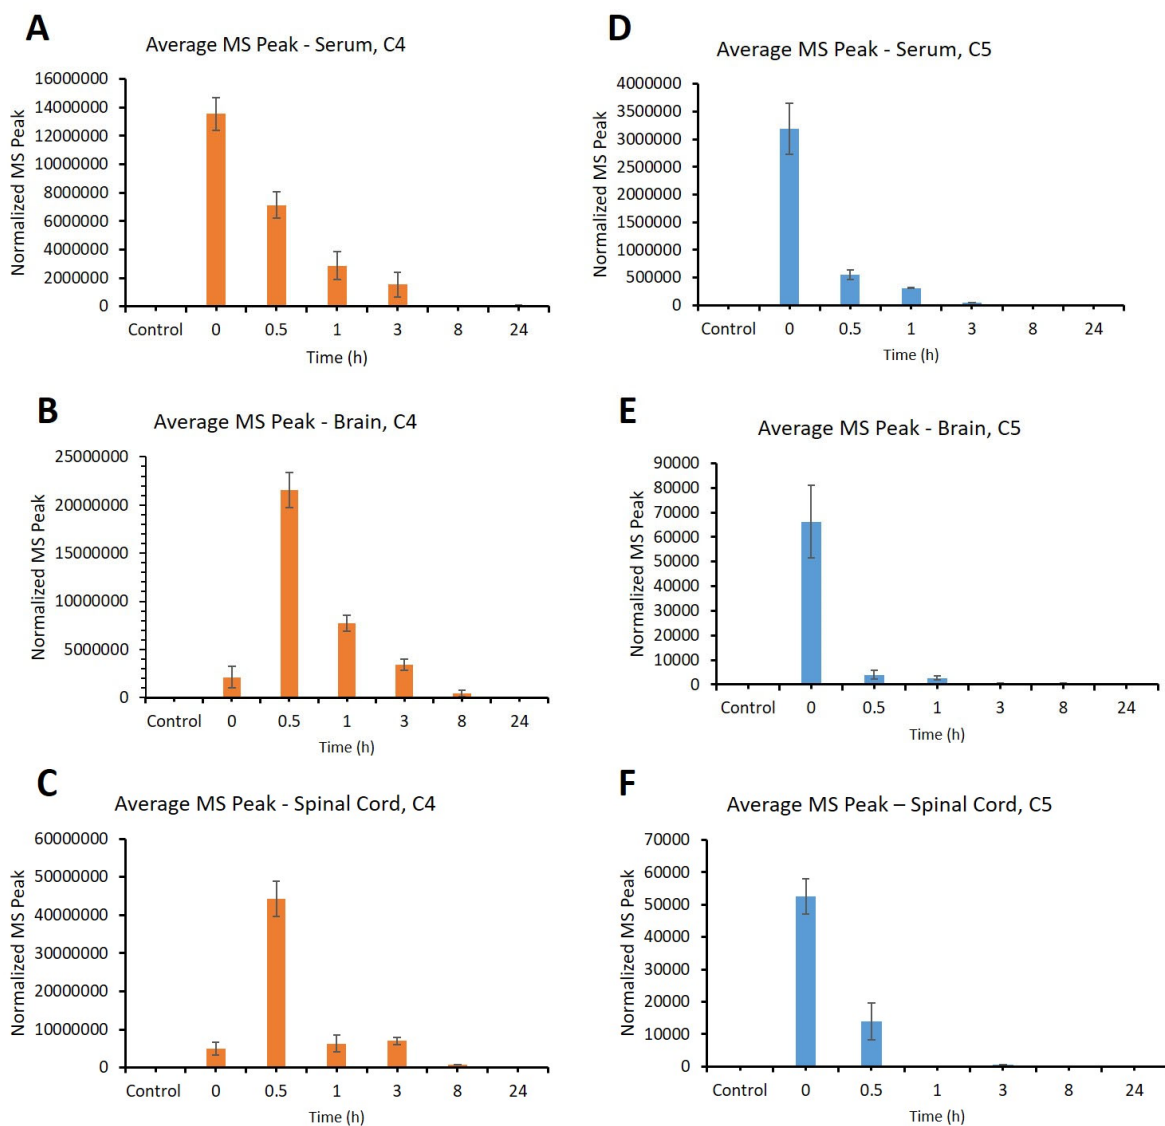

**Figure S6. LC-MS PK results of the determination of the levels of C4 and C5.** PK results show the levels of C4 (A-C) and C5 (D-F) in serum (A, D), brain (B, E) and spinal cord (C, F).
